# Supplementary material for: Reference gene identification and validation for quantitative real-time PCR studies in developing Xenopus laevis
Source: PubMed Central journal article supplement (PMC5764961; doi:10.1038/s41598-017-18684-1), 2018-01-11
Supplement: 41598_2017_18684_MOESM1_ESM.pdf [file 41598_2017_18684_MOESM1_ESM.pdf]

# **Reference gene identification and validation for quantitative real-time PCR studies in developing *Xenopus laevis***

Bilal B Mughal, Michelle Leemans, Petra Spirhanzlova, Barbara Demeneix & Jean-Baptiste Fini

CNRS / UMR7221, Museum National d'Histoire Naturelle, Paris, France

## **Supplementary figures**

# Supplementary figure legends

- **Supplementary figure 1:** (Table) List of genes ranked according their high mean expression levels during (more than 50 TPM) and the least variation between the stages.
- **Supplementary figure 2:** **(A)** Ranking of genes' Ct variation across the different developmental stages in whole embryos during early developmental stages and in brain during metamorphic stages. **(B)** Variation of 16 candidate genes RNA expression during different individual stages (whole embryo) using RT-qPCR. **(C)** Variation of 16 candidate genes RNA expression during different individual stages (metamorphic brains) using RT-qPCR.
- **Supplementary figure 3:** Pairwise Variation (V) analysis using geNorm of 16 reference genes in whole embryos during early developmental stages and in brain during metamorphic stages.
- **Supplementary figure 4: Comparison of four different statistical algorithms used to calculate reference gene stability.** Four different statistical algorithms, geNorm, delta-CT, NormFinder and BestKeeper, were used to compare the gene expression and stability of the 16 candidate reference genes.
- **Supplementary figure 5: Ct values of 16 reference genes in NF48 brain exposed to thyroid ( $T_3$ ).** Variation of 16 reference genes mRNA expression (Ct) assessed using RT-qPCR **(A)** Control vs T3 vs NH3 (T3 antagonist). **(B)** Variation of 16 candidate genes RNA expression during different series of experimental conditions Control vs T3, Control vs T3 vs NH3 (T3 antagonist) and, Control vs T3 vs NH3 (T3 antagonist) vs Triclosan. **(C)** Analysis using four different statistical algorithms, geNorm, delta-CT, NormFinder and BestKeeper on series of different experimental conditions. **(D)** Pairwise Variation (V) analysis using geNorm of 16 reference genes on series of different experimental conditions.
- **Supplementary Table 1:** Primers for gene expression (RT-qPCR). See material and methods



| Rank | Whole embryo + Oocyte |       |               | Whole embryo - Oocyte |       |               | Brain     |       |               |
|------|-----------------------|-------|---------------|-----------------------|-------|---------------|-----------|-------|---------------|
|      | Gene                  | Mean  | Std Deviation | Gene                  | Mean  | Std Deviation | Gene      | Mean  | Std Deviation |
| 1    | odc1.L                | 21.16 | 0.5408        | odc1.L                | 21.08 | 0.535         | sub1.L    | 24.93 | 0.4564        |
| 2    | mcts1.L               | 24.74 | 0.592         | mcts1.L               | 24.77 | 0.6279        | mtch.2    | 22.13 | 0.5497        |
| 3    | ppp1ca.L              | 22.61 | 0.6427        | ppp1ca.L              | 22.55 | 0.6674        | slc35b1.L | 25.92 | 0.5684        |
| 4    | ralb.S                | 23.45 | 0.7096        | ralb.S                | 23.36 | 0.7183        | eef1a1.S  | 17.83 | 0.5774        |
| 5    | lpcat3.S              | 25.08 | 0.7778        | lpcat3.S              | 25    | 0.7951        | clta.L    | 22.94 | 0.5981        |
| 6    | ube2m.S               | 23.4  | 0.817         | ube2m.S               | 23.28 | 0.8066        | lpcat3.S  | 25.65 | 0.6048        |
| 7    | slc35b1.L             | 25.03 | 0.8563        | sub1.L                | 25.18 | 0.8398        | mcts1.L   | 24.28 | 0.6065        |
| 8    | prcp.S                | 25.49 | 0.8603        | slc35b1.L             | 24.92 | 0.8573        | cox7b.S   | 24.44 | 0.6624        |
| 9    | sub1.L                | 25.33 | 0.8794        | prcp.S                | 25.37 | 0.8616        | prcp.S    | 25.86 | 0.7009        |
| 10   | clta.L                | 24.45 | 1.141         | clta.L                | 24.27 | 1.106         | cfl1.S    | 20.28 | 0.7162        |
| 11   | cox7b.S               | 25.28 | 1.153         | cox7b.S               | 25.22 | 1.226         | ube2m.S   | 22.11 | 0.7231        |
| 12   | mlf2.S                | 25.09 | 1.257         | mlf2.S                | 24.95 | 1.28          | mlf2.S    | 22.78 | 0.7612        |
| 13   | mtch.2                | 23.15 | 1.277         | mtch.2                | 23.02 | 1.311         | ralb.S    | 22.19 | 0.8204        |
| 14   | cfl1.S                | 22.61 | 1.405         | cfl1.S                | 22.51 | 1.472         | ppp1ca.L  | 23.54 | 0.9991        |
| 15   | tm9s4.L               | 23.61 | 2.213         | tm9s4.L               | 23.09 | 1.608         | odc1.L    | 22.45 | 1.159         |
| 16   | eef1a1.S              | 18.76 | 2.596         | eef1a1.S              | 18.12 | 2.085         | tm9s4.L   | 22.64 | 1.488         |

**Supplementary figure 2: (A)** Ranking of genes' Ct variation across the different developmental stages in whole embryos during early developmental stages and in brain during metamorphic stages. **(B)** Variation of 16 candidate genes RNA expression during different individual stages (whole embryo) using RT-qPCR. **(C)** Variation of 16 candidate genes RNA expression during different individual stages (metamorphic brains) using RT-qPCR.

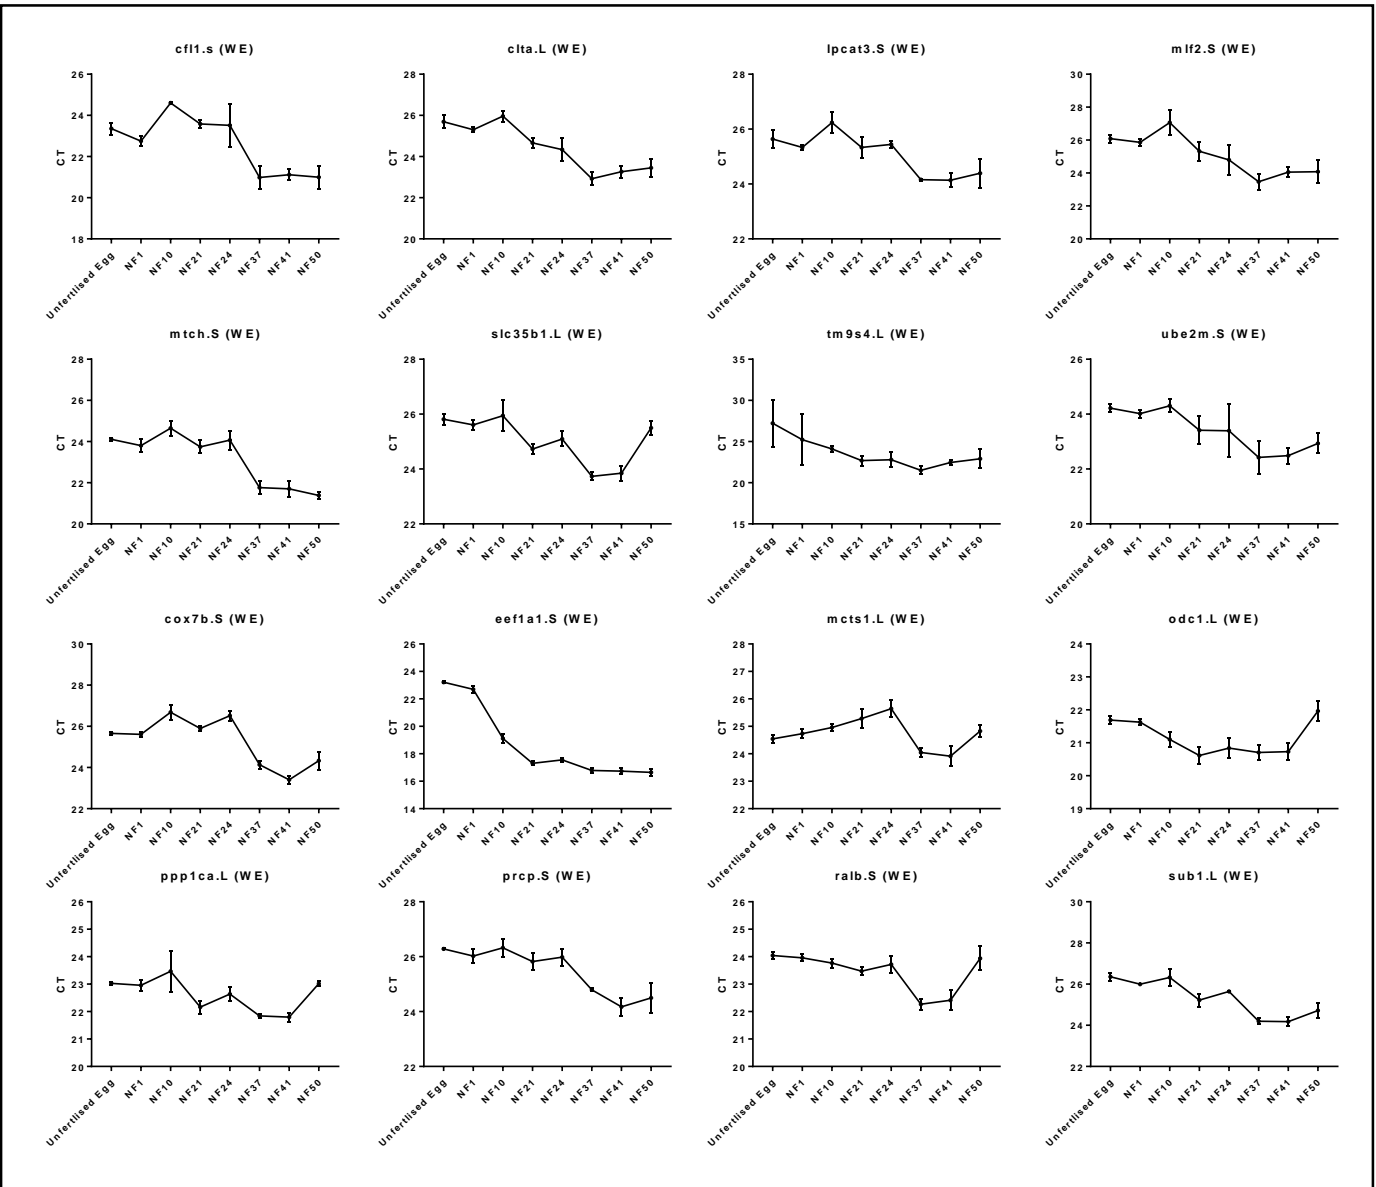

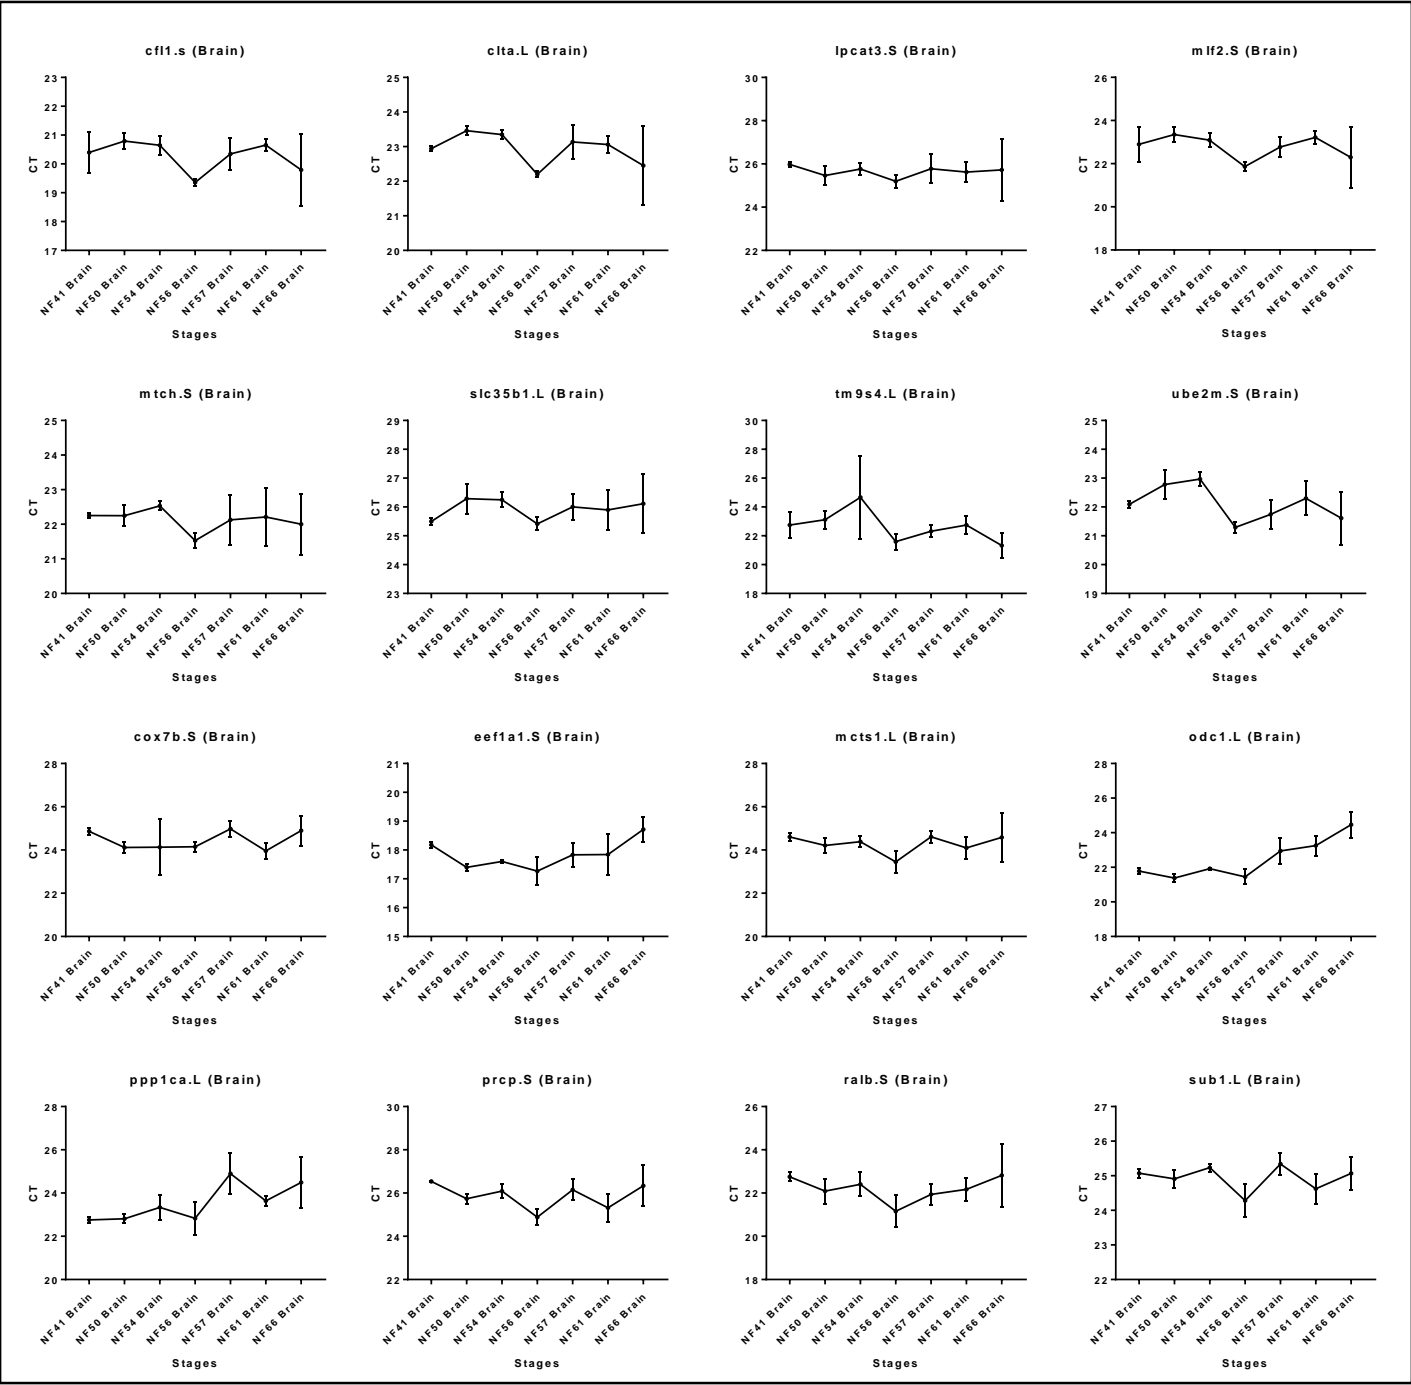

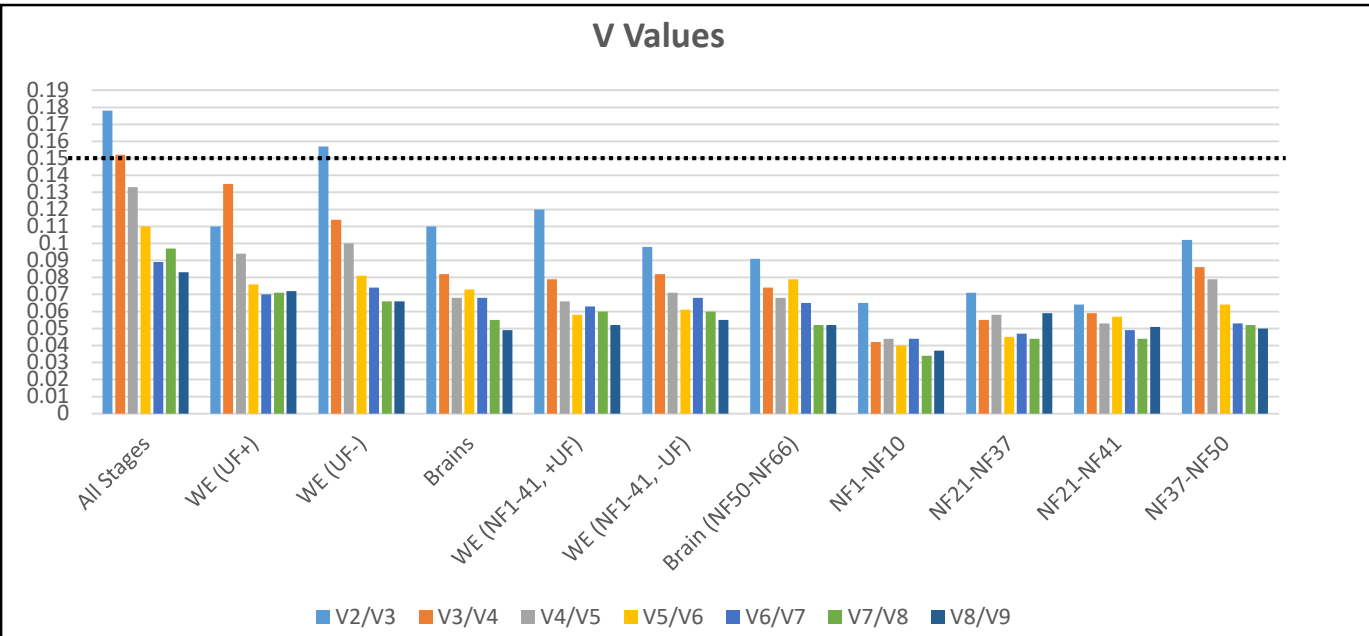

**Supplementary figure 3:** Pairwise Variation (V) analysis using geNorm of 16 reference genes in whole embryos during early developmental stages and in brain during metamorphic stages

| Sample group                               | geNorm |           |                 | Delta CT  |                  | NormFinder |                 | BestKeeper |          |          |
|--------------------------------------------|--------|-----------|-----------------|-----------|------------------|------------|-----------------|------------|----------|----------|
|                                            | Rank   | Gene      | Stability value | Genes     | Average of STDEV | Gene       | Stability Value | Gene       | CV (%Ct) | SD (±Ct) |
| All samples (Whole embryos + brains)       | 1      | clta.L    | 0.53            | sub1.L    | 0.91             | sub1.L     | 0.121           | clta.L     | 6.32     | 1.36     |
|                                            | 2      | ube2m.S   | 0.543           | mtch2.L   | 1.02             | mtch2.L    | 0.502           | clta.L     | 4.09     | 0.97     |
|                                            | 3      | mtch2.L   | 0.558           | ube2m.S   | 1.05             | ube2m.S    | 0.562           | lpcat3.S   | 2.27     | 0.57     |
|                                            | 4      | sub1.L    | 0.623           | mcts1.L   | 1.05             | mcts1.L    | 0.598           | mif2.S     | 5.29     | 1.27     |
|                                            | 5      | cox7b.S   | 0.678           | clta.L    | 1.05             | clta.L     | 0.602           | mtch2.L    | 4.28     | 0.97     |
|                                            | 6      | ralb.S    | 0.714           | prcp.S    | 1.07             | cox7b.S    | 0.627           | slc35b1.L  | 2.46     | 0.63     |
|                                            | 7      | mcts1.L   | 0.728           | cox7b.S   | 1.08             | ralb.S     | 0.629           | tm9s4.L    | 5.6      | 1.3      |
|                                            | 8      | prcp.S    | 0.769           | lpcat3.S  | 1.08             | prcp.S     | 0.636           | ube2m.S    | 3.52     | 0.8      |
|                                            | 9      | lpcat3.S  | 0.793           | ralb.S    | 1.09             | lpcat3.S   | 0.675           | cox7b.S    | 3.47     | 0.86     |
|                                            | 10     | slc35b1.L | 0.836           | slc35b1.L | 1.2              | slc35b1.L  | 0.862           | eef1a1.S   | 7.63     | 1.4      |
|                                            | 11     | mif2.S    | 0.899           | ppp1ca.L  | 1.32             | ppp1ca.L   | 1.054           | mcts1.L    | 2.01     | 0.49     |
|                                            | 12     | cf1.S     | 0.942           | mif2.S    | 1.32             | mif2.S     | 1.064           | odc1.L     | 3.56     | 0.77     |
|                                            | 13     | ppp1ca.L  | 0.989           | cf1.S     | 1.39             | cf1.S      | 1.161           | ppp1ca.L   | 2.96     | 0.68     |
|                                            | 14     | odc1.L    | 1.058           | odc1.L    | 1.57             | odc1.L     | 1.387           | prcp.S     | 2.57     | 0.66     |
|                                            | 15     | eef1a1.S  | 1.155           | eef1a1.S  | 1.77             | eef1a1.S   | 1.547           | ralb.S     | 3.71     | 0.85     |
|                                            | 16     | tm9s4.L   | 1.235           | tm9s4.L   | 1.8              | tm9s4.L    | 1.581           | sub1.L     | 2.34     | 0.59     |
| Whole Embryos (including unfertilised egg) | 1      | prcp.S    | 0.361           | sub1.L    | 0.76             | sub1.L     | 0.175           | cf1.S      | 5.3      | 1.2      |
|                                            | 2      | sub1.L    | 0.362           | lpcat3.S  | 0.81             | clta.L     | 0.335           | clta.L     | 4.05     | 0.99     |
|                                            | 3      | lpcat3.S  | 0.366           | prcp.S    | 0.83             | ube2m.S    | 0.341           | lpcat3.S   | 2.6      | 0.65     |
|                                            | 4      | slc35b1.L | 0.468           | ube2m.S   | 0.84             | lpcat3.S   | 0.369           | mif2.S     | 4.24     | 1.06     |
|                                            | 5      | ppp1ca.L  | 0.497           | clta.L    | 0.85             | prcp.S     | 0.369           | mtch2.L    | 4.98     | 1.15     |
|                                            | 6      | ube2m.S   | 0.517           | slc35b1.L | 0.86             | slc35b1.L  | 0.428           | slc35b1.L  | 2.86     | 0.72     |
|                                            | 7      | ralb.S    | 0.538           | ppp1ca.L  | 0.91             | mif2.S     | 0.568           | tm9s4.L    | 6.32     | 1.49     |
|                                            | 8      | clta.L    | 0.568           | ralb.S    | 0.93             | ppp1ca.L   | 0.569           | ube2m.S    | 3.09     | 0.72     |
|                                            | 9      | mif2.S    | 0.606           | mtch2.L   | 0.96             | ralb.S     | 0.593           | cox7b.S    | 3.92     | 0.99     |
|                                            | 10     | cox7b.S   | 0.637           | mif2.S    | 0.96             | mtch2.L    | 0.605           | eef1a1.S   | 11.66    | 2.19     |
|                                            | 11     | mtch2.L   | 0.657           | cox7b.S   | 0.97             | cox7b.S    | 0.674           | mcts1.L    | 1.86     | 0.46     |
|                                            | 12     | mcts1.L   | 0.683           | mcts1.L   | 1.05             | mcts1.L    | 0.826           | odc1.L     | 2.2      | 0.47     |
|                                            | 13     | cf1.S     | 0.712           | cf1.S     | 1.1              | cf1.S      | 0.851           | ppp1ca.L   | 2.34     | 0.53     |
|                                            | 14     | odc1.L    | 0.748           | odc1.L    | 1.12             | odc1.L     | 0.876           | prcp.S     | 2.94     | 0.75     |
|                                            | 15     | tm9s4.L   | 0.905           | tm9s4.L   | 1.92             | tm9s4.L    | 1.759           | ralb.S     | 2.42     | 0.57     |
|                                            | 16     | eef1a1.S  | 1.066           | eef1a1.S  | 2.19             | eef1a1.S   | 2.081           | sub1.L     | 3.04     | 0.77     |
| Whole Embryos (minus unfertilised egg)     | 1      | slc35b1.L | 0.39            | sub1.L    | 0.7              | sub1.L     | 0.057           | cf1.S      | 5.64     | 1.27     |
|                                            | 2      | ppp1ca.L  | 0.404           | lpcat3.S  | 0.76             | lpcat3.S   | 0.338           | clta.L     | 3.95     | 0.96     |
|                                            | 3      | sub1.L    | 0.435           | clta.L    | 0.79             | clta.L     | 0.352           | lpcat3.S   | 2.68     | 0.67     |
|                                            | 4      | lpcat3.S  | 0.469           | prcp.S    | 0.79             | ube2m.S    | 0.373           | mif2.S     | 4.22     | 1.05     |
|                                            | 5      | prcp.S    | 0.502           | ube2m.S   | 0.8              | prcp.S     | 0.397           | mtch2.L    | 5.22     | 1.2      |
|                                            | 6      | ube2m.S   | 0.53            | slc35b1.L | 0.81             | slc35b1.L  | 0.446           | slc35b1.L  | 2.87     | 0.71     |
|                                            | 7      | ralb.S    | 0.555           | ppp1ca.L  | 0.85             | ppp1ca.L   | 0.544           | tm9s4.L    | 4.54     | 1.05     |
|                                            | 8      | mcts1.L   | 0.577           | ralb.S    | 0.9              | mif2.S     | 0.61            | ube2m.S    | 2.97     | 0.69     |
|                                            | 9      | clta.L    | 0.603           | mif2.S    | 0.93             | ralb.S     | 0.613           | cox7b.S    | 4.31     | 1.09     |
|                                            | 10     | cox7b.S   | 0.637           | cox7b.S   | 0.93             | cox7b.S    | 0.659           | eef1a1.S   | 8.78     | 1.59     |
|                                            | 11     | mtch2.L   | 0.669           | mtch2.L   | 0.93             | mtch2.L    | 0.661           | mcts1.L    | 1.99     | 0.49     |
|                                            | 12     | mif2.S    | 0.693           | mcts1.L   | 0.94             | mcts1.L    | 0.686           | odc1.L     | 2.05     | 0.43     |
|                                            | 13     | cf1.S     | 0.728           | cf1.S     | 1.09             | cf1.S      | 0.898           | ppp1ca.L   | 2.44     | 0.55     |
|                                            | 14     | odc1.L    | 0.769           | odc1.L    | 1.11             | odc1.L     | 0.914           | prcp.S     | 2.99     | 0.76     |
|                                            | 15     | tm9s4.L   | 0.854           | tm9s4.L   | 1.41             | tm9s4.L    | 1.231           | ralb.S     | 2.5      | 0.58     |
|                                            | 16     | eef1a1.S  | 0.97            | eef1a1.S  | 1.79             | eef1a1.S   | 1.674           | sub1.L     | 2.89     | 0.73     |
| Brains (NF41-NF66)                         | 1      | lpcat3.S  | 0.319           | mcts1.L   | 0.59             | mcts1.L    | 0.211           | cf1.S      | 2.98     | 0.61     |
|                                            | 2      | mcts1.L   | 0.331           | mtch2.L   | 0.61             | mtch2.L    | 0.237           | clta.L     | 2.08     | 0.48     |
|                                            | 3      | mtch2.L   | 0.341           | lpcat3.S  | 0.62             | lpcat3.S   | 0.248           | lpcat3.S   | 1.84     | 0.47     |
|                                            | 4      | sub1.L    | 0.359           | sub1.L    | 0.62             | sub1.L     | 0.257           | mif2.S     | 2.76     | 0.63     |
|                                            | 5      | slc35b1.L | 0.378           | slc35b1.L | 0.64             | slc35b1.L  | 0.306           | mtch2.L    | 2.07     | 0.46     |
|                                            | 6      | clta.L    | 0.418           | clta.L    | 0.68             | clta.L     | 0.411           | slc35b1.L  | 1.74     | 0.45     |
|                                            | 7      | cf1.S     | 0.453           | prcp.S    | 0.7              | prcp.S     | 0.446           | tm9s4.L    | 4.12     | 0.93     |
|                                            | 8      | mif2.S    | 0.467           | cf1.S     | 0.72             | ralb.S     | 0.467           | ube2m.S    | 2.78     | 0.61     |
|                                            | 9      | ube2m.S   | 0.482           | ralb.S    | 0.73             | cf1.S      | 0.471           | cox7b.S    | 2.02     | 0.49     |
|                                            | 10     | prcp.S    | 0.505           | mif2.S    | 0.74             | mif2.S     | 0.503           | eef1a1.S   | 2.62     | 0.47     |
|                                            | 11     | ralb.S    | 0.523           | eef1a1.S  | 0.75             | eef1a1.S   | 0.507           | mcts1.L    | 1.86     | 0.45     |
|                                            | 12     | eef1a1.S  | 0.547           | ube2m.S   | 0.76             | ube2m.S    | 0.538           | odc1.L     | 4.28     | 0.96     |
|                                            | 13     | cox7b.S   | 0.575           | cox7b.S   | 0.81             | cox7b.S    | 0.592           | ppp1ca.L   | 3.12     | 0.73     |
|                                            | 14     | ppp1ca.L  | 0.627           | ppp1ca.L  | 0.98             | ppp1ca.L   | 0.823           | prcp.S     | 2.12     | 0.55     |
|                                            | 15     | odc1.L    | 0.691           | odc1.L    | 1.17             | odc1.L     | 1.071           | ralb.S     | 2.62     | 0.58     |
|                                            | 16     | tm9s4.L   | 0.786           | tm9s4.L   | 1.45             | tm9s4.L    | 1.377           | sub1.L     | 1.38     | 0.34     |

**Supplementary figure 4: Comparison of 4 different statistical algorithms used to calculate reference gene stability.** Four different statistical algorithms, geNorm, delta-CT, NormFinder and BestKeeper, were used to compare the gene expression and stability of the 16 candidate reference genes.





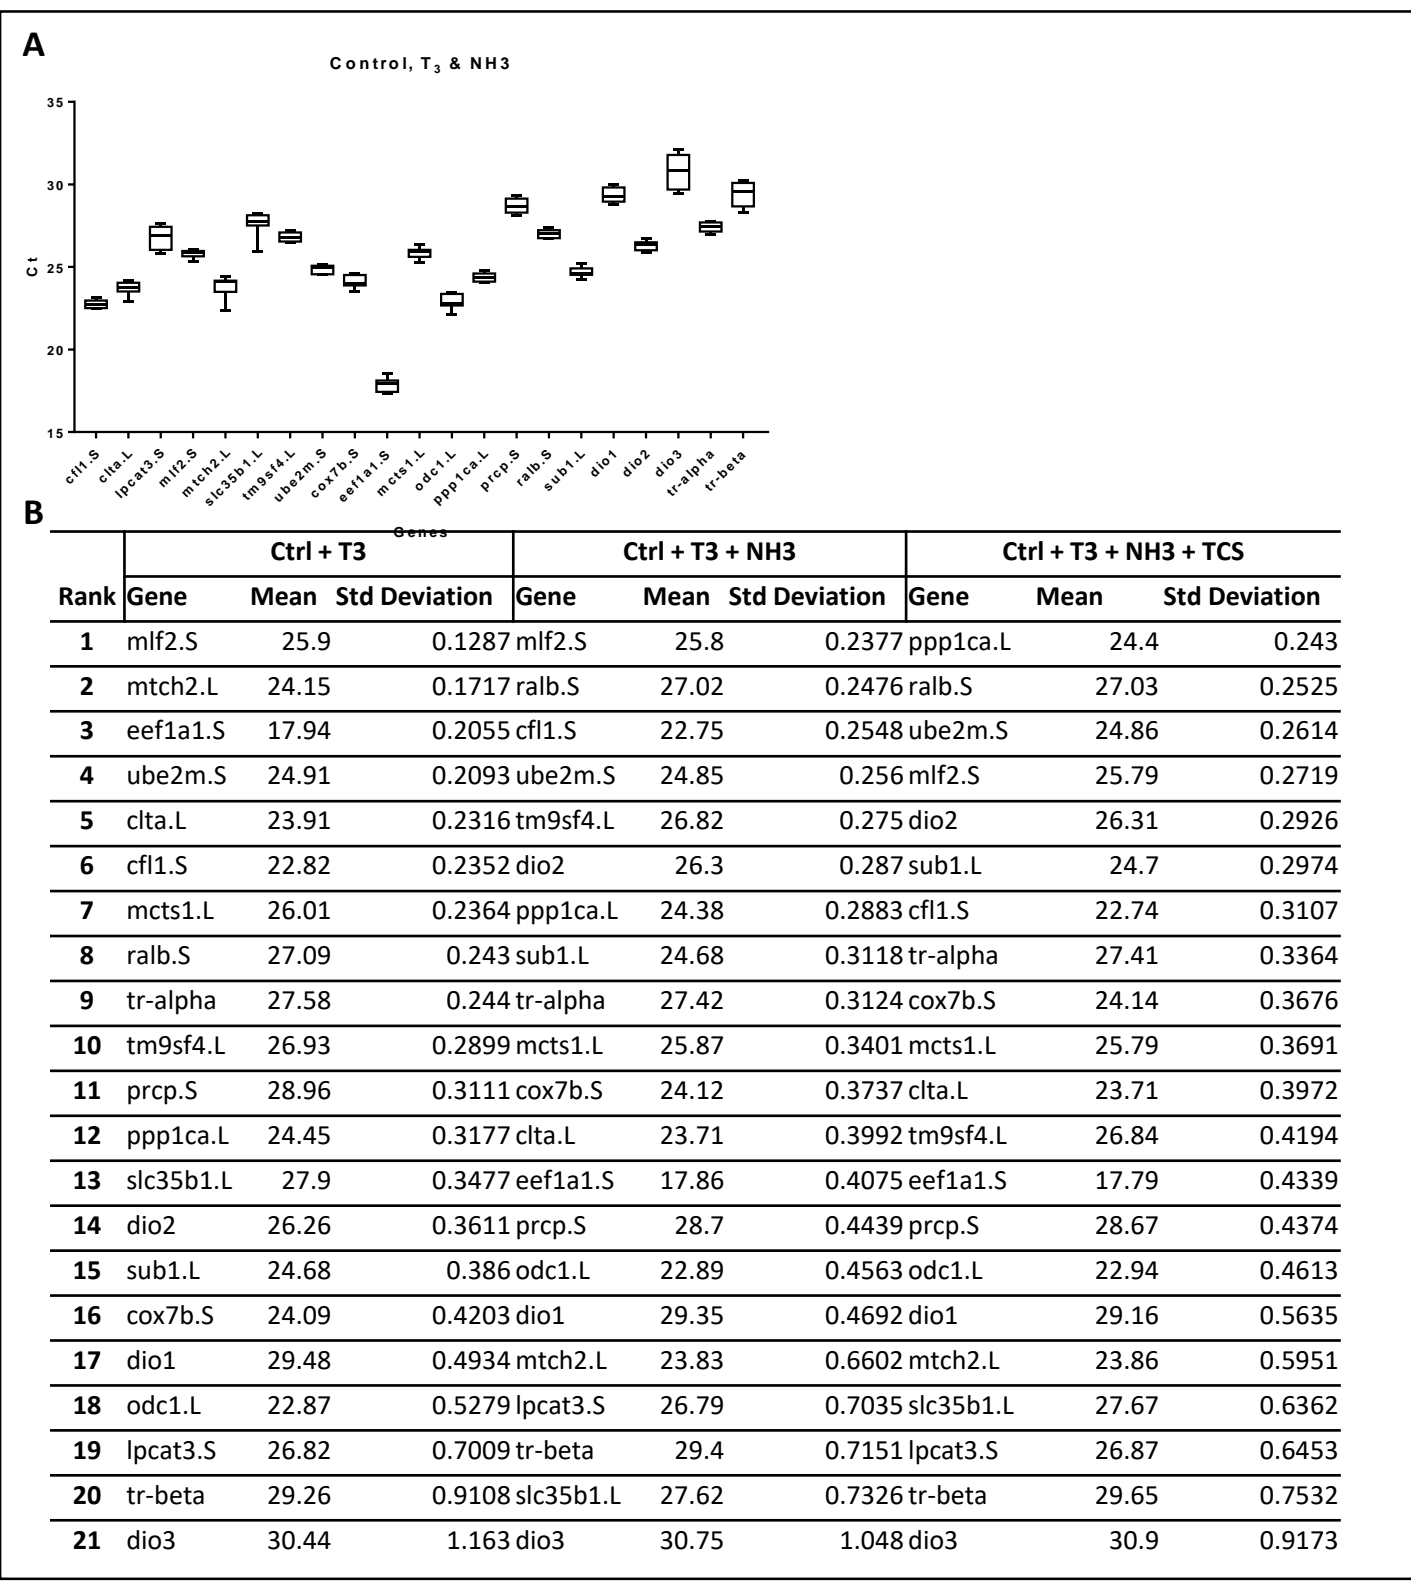

**Supplementary figure 5: Ct values of 16 reference genes in NF48 brain exposed to thyroid (T<sub>3</sub>).** Variation of 16 reference genes mRNA expression (Ct) assessed using RT-qPCR (A) Control vs T3 vs NH3 (T3 antagonist). (B) Variation of 16 candidate genes RNA expression during different series of experimental conditions Control vs T3, Control vs T3 vs NH3 (T3 antagonist) and, Control vs T3 vs NH3 (T3 antagonist) vs Triclosan. (C) Analysis using four different statistical algorithms, geNorm, delta-CT, NormFinder and BestKeeper on series of different experimental conditions.

C

| Sample group            | Rank | geNorm    |                 | Delta CT  |                  | NormFinder |                 | BestKeeper |          |                |
|-------------------------|------|-----------|-----------------|-----------|------------------|------------|-----------------|------------|----------|----------------|
|                         |      | Gene      | Stability value | Genes     | Average of STDEV | Gene       | Stability Value | Gene       | CV (%Ct) | SD ( $\pm$ Ct) |
| Control + T3 + NH3      | 1    | ralb.S    | 0.12            | ube2m.S   | 0.35             | cf1.S      | 0.022           | cf1.S      | 0.95     | 0.22           |
|                         | 2    | ube2m.S   | 0.122           | cf1.S     | 0.36             | ube2m.S    | 0.057           | cta.L      | 1.12     | 0.27           |
|                         | 3    | mf2.S     | 0.126           | ralb.S    | 0.36             | ralb.S     | 0.125           | lpcat3.S   | 2.22     | 0.6            |
|                         | 4    | cf1.S     | 0.139           | mf2.S     | 0.38             | sub1.L     | 0.158           | mf2.S      | 0.72     | 0.19           |
|                         | 5    | tm9sf4.L  | 0.161           | tm9sf4.L  | 0.39             | tm9sf4.L   | 0.171           | mtch2.L    | 2.02     | 0.48           |
|                         | 6    | ppp1ca.L  | 0.169           | sub1.L    | 0.39             | mf2.S      | 0.183           | slc35b1.L  | 1.69     | 0.47           |
|                         | 7    | sub1.L    | 0.186           | ppp1ca.L  | 0.4              | ppp1ca.L   | 0.188           | tm9sf4.L   | 0.84     | 0.23           |
|                         | 8    | cox7b.S   | 0.204           | eef1a1.S  | 0.41             | cox7b.S    | 0.203           | ube2m.S    | 0.9      | 0.22           |
|                         | 9    | dio2      | 0.219           | cox7b.S   | 0.41             | eef1a1.S   | 0.208           | cox7b.S    | 1.27     | 0.31           |
|                         | 10   | odc1.L    | 0.232           | mcts1.L   | 0.43             | odc1.L     | 0.248           | eef1a1.S   | 1.79     | 0.32           |
|                         | 11   | eef1a1.S  | 0.246           | cta.L     | 0.43             | cta.L      | 0.249           | mcts1.L    | 0.98     | 0.25           |
|                         | 12   | mcts1.L   | 0.257           | odc1.L    | 0.44             | mcts1.L    | 0.27            | odc1.L     | 1.58     | 0.36           |
|                         | 13   | cta.L     | 0.272           | dio2      | 0.46             | dio2       | 0.306           | ppp1ca.L   | 1.05     | 0.26           |
|                         | 14   | tr-alpha  | 0.294           | prcp.S    | 0.52             | prcp.S     | 0.405           | prcp.S     | 1.27     | 0.37           |
|                         | 15   | prcp.S    | 0.31            | tr-alpha  | 0.53             | tr-alpha   | 0.434           | ralb.S     | 0.74     | 0.2            |
|                         | 16   | dio1      | 0.336           | mtch2.L   | 0.6              | mtch2.L    | 0.489           | sub1.L     | 0.98     | 0.24           |
|                         | 17   | mtch2.L   | 0.362           | dio1      | 0.62             | lpcat3.S   | 0.533           | dio1       | 1.41     | 0.41           |
|                         | 18   | slc35b1.L | 0.39            | slc35b1.L | 0.65             | slc35b1.L  | 0.541           | dio2       | 0.84     | 0.22           |
|                         | 19   | lpcat3.S  | 0.415           | lpcat3.S  | 0.65             | dio1       | 0.548           | dio3       | 2.9      | 0.89           |
|                         | 20   | tr-beta   | 0.45            | tr-beta   | 0.76             | tr-beta    | 0.677           | tr-alpha   | 0.99     | 0.27           |
|                         | 21   | dio3      | 0.502           | dio3      | 0.99             | dio3       | 0.951           | tr-beta    | 2        | 0.59           |
| Sample group            | Rank | Gene      | Stability value | Genes     | Average of STDEV | Gene       | Stability Value | Gene       | CV (%Ct) | SD ( $\pm$ Ct) |
| Control + T3 + NH + TCS | 1    | ube2m.S   | 0.125           | ube2m.S   | 0.34             | cf1.S      | 0.057           | cf1.S      | 1.15     | 0.26           |
|                         | 2    | ralb.S    | 0.127           | cf1.S     | 0.34             | ube2m.S    | 0.065           | cta.L      | 1.23     | 0.29           |
|                         | 3    | mf2.S     | 0.128           | ralb.S    | 0.35             | ralb.S     | 0.118           | lpcat3.S   | 2.08     | 0.56           |
|                         | 4    | cf1.S     | 0.14            | mf2.S     | 0.35             | sub1.L     | 0.142           | mf2.S      | 0.86     | 0.22           |
|                         | 5    | sub1.L    | 0.167           | sub1.L    | 0.37             | mf2.S      | 0.155           | mtch2.L    | 1.87     | 0.45           |
|                         | 6    | cox7b.S   | 0.184           | cox7b.S   | 0.38             | cox7b.S    | 0.169           | slc35b1.L  | 1.47     | 0.41           |
|                         | 7    | dio2      | 0.199           | cta.L     | 0.39             | cta.L      | 0.209           | tm9sf4.L   | 1.21     | 0.32           |
|                         | 8    | ppp1ca.L  | 0.21            | eef1a1.S  | 0.41             | odc1.L     | 0.226           | ube2m.S    | 0.94     | 0.23           |
|                         | 9    | odc1.L    | 0.223           | ppp1ca.L  | 0.41             | ppp1ca.L   | 0.229           | cox7b.S    | 1.32     | 0.32           |
|                         | 10   | eef1a1.S  | 0.241           | odc1.L    | 0.41             | eef1a1.S   | 0.241           | eef1a1.S   | 1.92     | 0.34           |
|                         | 11   | mcts1.L   | 0.254           | mcts1.L   | 0.42             | dio2       | 0.254           | mcts1.L    | 1.12     | 0.29           |
|                         | 12   | cta.L     | 0.264           | dio2      | 0.42             | tm9sf4.L   | 0.269           | odc1.L     | 1.74     | 0.4            |
|                         | 13   | tm9sf4.L  | 0.273           | tm9sf4.L  | 0.43             | mcts1.L    | 0.278           | ppp1ca.L   | 0.81     | 0.2            |
|                         | 14   | prcp.S    | 0.289           | prcp.S    | 0.47             | prcp.S     | 0.352           | prcp.S     | 1.26     | 0.36           |
|                         | 15   | tr-alpha  | 0.301           | tr-alpha  | 0.49             | tr-alpha   | 0.379           | ralb.S     | 0.76     | 0.21           |
|                         | 16   | mtch2.L   | 0.323           | mtch2.L   | 0.52             | mtch2.L    | 0.41            | sub1.L     | 0.97     | 0.24           |
|                         | 17   | slc35b1.L | 0.347           | slc35b1.L | 0.57             | slc35b1.L  | 0.462           | dio1       | 1.49     | 0.43           |
|                         | 18   | lpcat3.S  | 0.369           | lpcat3.S  | 0.58             | lpcat3.S   | 0.468           | dio2       | 0.91     | 0.24           |
|                         | 19   | dio1      | 0.391           | dio1      | 0.64             | dio1       | 0.584           | dio3       | 2.46     | 0.76           |
|                         | 20   | tr-beta   | 0.431           | tr-beta   | 0.78             | tr-beta    | 0.711           | tr-alpha   | 1.07     | 0.29           |
|                         | 21   | dio3      | 0.475           | dio3      | 0.89             | dio3       | 0.842           | tr-beta    | 1.97     | 0.58           |
| Sample group            | Rank | Gene      | Stability value | Genes     | Average of STDEV | Gene       | Stability Value | Gene       | CV (%Ct) | SD ( $\pm$ Ct) |
| Control + T3            | 1    | eef1a1.S  | 0.091           | ube2m.S   | 0.33             | cf1.S      | 0.047           | cf1.S      | 0.77     | 0.18           |
|                         | 2    | ube2m.S   | 0.096           | cf1.S     | 0.34             | ube2m.S    | 0.079           | cta.L      | 0.84     | 0.2            |
|                         | 3    | mf2.S     | 0.098           | eef1a1.S  | 0.34             | sub1.L     | 0.119           | lpcat3.S   | 2.16     | 0.58           |
|                         | 4    | ralb.S    | 0.12            | mf2.S     | 0.34             | slc35b1.L  | 0.123           | mf2.S      | 0.37     | 0.09           |
|                         | 5    | cta.L     | 0.138           | ralb.S    | 0.35             | eef1a1.S   | 0.136           | mtch2.L    | 0.46     | 0.11           |
|                         | 6    | cf1.S     | 0.15            | slc35b1.L | 0.37             | ralb.S     | 0.141           | slc35b1.L  | 1.03     | 0.29           |
|                         | 7    | mtch2.L   | 0.161           | cta.L     | 0.37             | mf2.S      | 0.158           | tm9sf4.L   | 0.87     | 0.23           |
|                         | 8    | slc35b1.L | 0.182           | sub1.L    | 0.37             | cox7b.S    | 0.166           | ube2m.S    | 0.58     | 0.14           |
|                         | 9    | sub1.L    | 0.199           | mtch2.L   | 0.37             | mtch2.L    | 0.174           | cox7b.S    | 1.37     | 0.33           |
|                         | 10   | tm9sf4.L  | 0.211           | tm9sf4.L  | 0.38             | tm9sf4.L   | 0.185           | eef1a1.S   | 0.81     | 0.15           |
|                         | 11   | cox7b.S   | 0.221           | cox7b.S   | 0.38             | cta.L      | 0.201           | mcts1.L    | 0.59     | 0.15           |
|                         | 12   | ppp1ca.L  | 0.23            | ppp1ca.L  | 0.4              | ppp1ca.L   | 0.224           | odc1.L     | 1.72     | 0.39           |
|                         | 13   | dio2      | 0.239           | dio2      | 0.41             | dio2       | 0.232           | ppp1ca.L   | 1.08     | 0.26           |
|                         | 14   | mcts1.L   | 0.248           | mcts1.L   | 0.41             | odc1.L     | 0.28            | prcp.S     | 0.85     | 0.25           |
|                         | 15   | prcp.S    | 0.261           | odc1.L    | 0.45             | mcts1.L    | 0.284           | ralb.S     | 0.66     | 0.18           |
|                         | 16   | odc1.L    | 0.273           | prcp.S    | 0.46             | prcp.S     | 0.351           | sub1.L     | 1.18     | 0.29           |
|                         | 17   | tr-alpha  | 0.29            | tr-alpha  | 0.51             | tr-alpha   | 0.436           | dio1       | 1.39     | 0.41           |
|                         | 18   | lpcat3.S  | 0.329           | lpcat3.S  | 0.68             | lpcat3.S   | 0.592           | dio2       | 1.11     | 0.29           |
|                         | 19   | dio1      | 0.364           | dio1      | 0.75             | dio1       | 0.719           | dio3       | 3.18     | 0.97           |
|                         | 20   | tr-beta   | 0.41            | tr-beta   | 0.81             | tr-beta    | 0.748           | tr-alpha   | 0.61     | 0.17           |
|                         | 21   | dio3      | 0.468           | dio3      | 1.02             | dio3       | 0.99            | tr-beta    | 2.65     | 0.78           |
| Sample group            | Rank | Gene      | Stability value | Genes     | Average of STDEV | Gene       | Stability Value | Gene       | CV (%Ct) | SD ( $\pm$ Ct) |
| Control + NH3           | 1    | ube2m.S   | 0.054           | cf1.S     | 0.26             | cf1.S      | 0.042           | cf1.S      | 1.14     | 0.26           |
|                         | 2    | cox7b.S   | 0.055           | ube2m.S   | 0.27             | odc1.L     | 0.048           | cta.L      | 1.46     | 0.35           |
|                         | 3    | cf1.S     | 0.067           | cox7b.S   | 0.27             | ube2m.S    | 0.094           | lpcat3.S   | 2.05     | 0.55           |
|                         | 4    | ralb.S    | 0.085           | odc1.L    | 0.27             | cox7b.S    | 0.1             | mf2.S      | 0.88     | 0.23           |
|                         | 5    | sub1.L    | 0.096           | ralb.S    | 0.28             | sub1.L     | 0.128           | mtch2.L    | 2.79     | 0.66           |
|                         | 6    | mf2.S     | 0.104           | sub1.L    | 0.28             | ralb.S     | 0.134           | slc35b1.L  | 2.37     | 0.65           |
|                         | 7    | odc1.L    | 0.113           | mf2.S     | 0.3              | cta.L      | 0.171           | tm9sf4.L   | 0.85     | 0.23           |
|                         | 8    | mcts1.L   | 0.122           | mcts1.L   | 0.31             | tm9sf4.L   | 0.178           | ube2m.S    | 1.02     | 0.25           |
|                         | 9    | ppp1ca.L  | 0.134           | tm9sf4.L  | 0.31             | mf2.S      | 0.187           | cox7b.S    | 1.09     | 0.27           |
|                         | 10   | tm9sf4.L  | 0.145           | ppp1ca.L  | 0.32             | mcts1.L    | 0.194           | eef1a1.S   | 2.27     | 0.41           |
|                         | 11   | dio2      | 0.165           | cta.L     | 0.34             | ppp1ca.L   | 0.196           | mcts1.L    | 1.12     | 0.29           |
|                         | 12   | tr-alpha  | 0.183           | prcp.S    | 0.37             | eef1a1.S   | 0.256           | odc1.L     | 1.42     | 0.33           |
|                         | 13   | tr-beta   | 0.2             | eef1a1.S  | 0.38             | prcp.S     | 0.259           | ppp1ca.L   | 1        | 0.25           |
|                         | 14   | prcp.S    | 0.214           | dio2      | 0.38             | tr-beta    | 0.309           | prcp.S     | 1.08     | 0.31           |
|                         | 15   | cta.L     | 0.227           | tr-beta   | 0.4              | dio2       | 0.314           | ralb.S     | 0.79     | 0.21           |
|                         | 16   | eef1a1.S  | 0.243           | tr-alpha  | 0.41             | dio1       | 0.341           | sub1.L     | 0.83     | 0.21           |
|                         | 17   | dio1      | 0.257           | dio1      | 0.43             | tr-alpha   | 0.361           | dio1       | 0.71     | 0.21           |
|                         | 18   | dio3      | 0.283           | dio3      | 0.49             | dio3       | 0.396           | dio2       | 0.47     | 0.13           |
|                         | 19   | lpcat3.S  | 0.309           | lpcat3.S  | 0.51             | lpcat3.S   | 0.434           | dio3       | 1.59     | 0.5            |
|                         | 20   | mtch2.L   | 0.337           | mtch2.L   | 0.57             | mtch2.L    | 0.52            | tr-alpha   | 0.69     | 0.19           |
|                         | 21   | slc35b1.L | 0.374           | slc35b1.L | 0.72             | slc35b1.L  | 0.694           | tr-beta    | 0.97     | 0.29           |

D

V Values

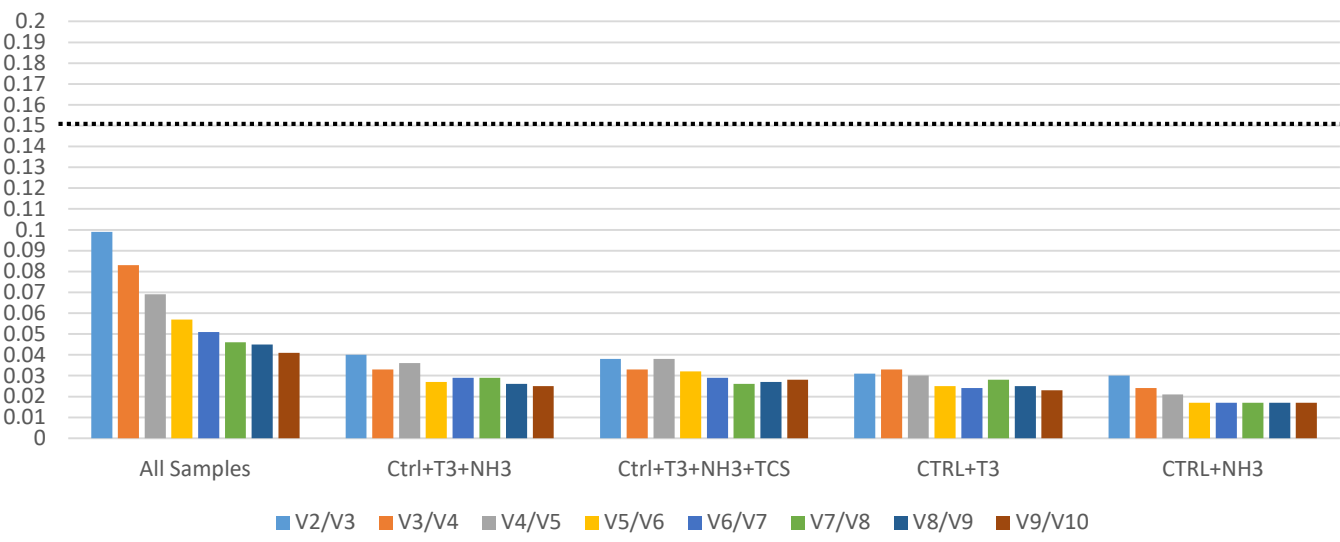

# Supplementary table 1

Primers for gene expression (RT-qPCR)

| Gene      | Forward primer                | Reverse primer            | Exon                                   | Length (bp) | Efficiency | Slope (R <sup>2</sup> ) |
|-----------|-------------------------------|---------------------------|----------------------------------------|-------------|------------|-------------------------|
| clta.L    | GGGATGGGCGCTCAGATACT          | GTCAGCGTGTGAAATGGCTG      | E2-E3J                                 | 92          | 93.599     | 0.984                   |
| cfl1.S    | TCGTTCTCTCGCTGAAGACTC         | CCATCACACCAGAGGCCATTTT    | E1-E2J                                 | 88          | 102.668    | 0.996                   |
| mlf2.S    | CATGCGGCACATGTTCTCTG          | GTCACGGCTCCTTGCTGTAT      | E4-E5J                                 | 120         | 104.016    | 0.981                   |
| tm9sf4.L  | TGAGGTTGTGTGCGGGA             | GGTTATCCGCTATCAGGTGAA     | E4-E5J                                 | 114         | 93.713     | 0.995                   |
| lpcat3.S  | CAGTGATGATTGTACACCACTCC       | ATGCCCTCCCTCAAGTCAA       | E13J-UTR                               | 122         | 121.422    | 0.947                   |
| slc35b1.L | CGCATTCCAACAGGCTCC            | CAAGAAGTCCCAGAGCTCGC      | E7-E8                                  | 107         | 97.972     | 0.932                   |
| mtch2.L   | TCGCACCCGATGATGTATGT          | TGATGTGTTTGGCATAGGAGA     | E2-E3J                                 | 133         | 100.694    | 0.994                   |
| ube2m.S   | AGAGAGGACTGGAAGCCTGT          | CGGGTCTTCAGGATTGGCT       | E5-E6                                  | 87          | 91.468     | 0.964                   |
| ppp1ca.L  | ACGAGTCTCTCATGTGCTCC          | CAGAGCTGGGAGGGGTCATT      | E4-E5                                  | 140         | 92.59      | 0.997                   |
| sub1.L    | AGCAGGAGAAATGAAGCCAGG         | CCGACATCTGCTCCTTCAGT      | E4-E5                                  | 80          | 97.972     | 0.973                   |
| mcts1.L   | CACTGAGACTGCTTCACAAATATCC     | TGATGTTAGCGCCACTCAGG      | E4J-E5                                 | 106         | 116.719    | 0.956                   |
| ralb.S    | CCACTGCCGAGTTCAGGGAA          | CCAGATCGGATTGTTGCC        | E4J-E5                                 | 90          | 107.707    | 0.985                   |
| cox7b.S   | GGGTTATGTTATTACACAGACTGG<br>c | ACAGGATTAACGCATAAAAAGGTAT | E3-UTR                                 | 132         | 96.615     | 0.97                    |
| prcp.S    | AGTCTTACCACCCACTGGA           | CGACATCCCACATAAACCTGTA    | E3-E4J                                 | 110         | 95.233     | 0.994                   |
| eef1a1.S  | TGGATATGCCCTGTGTTGGATT        | TCCACGCACATTGGCTTTCCT     | (Fini et al. 2012; Dubois et al. 2006) |             |            |                         |
| odc1.S    | TGAAAACATGGGTGCCTACA          | AAGTTCATTCCGCTCTCCT       |                                        |             |            |                         |
| dio1      | CAGCAGATGAATGGGCATTGA         | TGTCTAACACTACTGGCAAGAAGGT |                                        |             |            |                         |
| dio2      | CAAATCCAGCCAGAGAGTCAATGG      | TGACCTGCTTGAGGCATCCA      |                                        |             |            |                         |
| dio3      | CACAAAAAGTGCACCAAACG          | GCCTTGTTGCAGTTTACT        |                                        |             |            |                         |
| tr-alpha  | CGCCTTGGTCTCTTCGGAT           | CCAGAAGTGGGAATGTTGTGTT    |                                        |             |            |                         |
| tr-beta   | AAGAGTGGTTGATTTTGCCAAAA       | AGGGACATGATCTCCATACAACAG  |                                        |             |            |                         |

**Supplementary Table 1:** Primers for gene expression (RT-qPCR). See material and methods
